# Supplementary material
Source: publisher figshare collection journal article supplement (https://acs.figshare.com/ndownloader/files/5157439)
Supplement: Supplementary file 1 [file 5157439]

data_03rmd141
 
_audit_creation_method            SHELXL-97 
_chemical_name_systematic 
; 
 2,3-Pyrazine dicarboxylic acid dihydrate
; 
_chemical_name_common             '2,3-Pyrazine dicarboxylic acid dihydrate'
_chemical_melting_point           468 
_chemical_formula_moiety          C6H4N2O4.2H2O
_chemical_formula_sum             C6H8N2O6
_chemical_formula_weight          204.14 
 
loop_ 
 _atom_type_symbol 
 _atom_type_description 
 _atom_type_scat_dispersion_real 
 _atom_type_scat_dispersion_imag 
 _atom_type_scat_source 
 'C'  'C'   0.0033   0.0016 
 'International Tables Vol C Tables 4.2.6.8 and 6.1.1.4' 
 'H'  'H'   0.0000   0.0000 
 'International Tables Vol C Tables 4.2.6.8 and 6.1.1.4' 
 'N'  'N'   0.0061   0.0033 
 'International Tables Vol C Tables 4.2.6.8 and 6.1.1.4' 
 'O'  'O'   0.0106   0.0060 
 'International Tables Vol C Tables 4.2.6.8 and 6.1.1.4' 
 
_symmetry_cell_setting            Monoclinic 
_symmetry_space_group_name_H-M    'C 2/c'
_symmetry_space_group_name_Hall   '-C 2yc'
 
loop_ 
 _symmetry_equiv_pos_as_xyz 
 'x, y, z' 
 '-x, y, -z+1/2' 
 'x+1/2, y+1/2, z' 
 '-x+1/2, y+1/2, -z+1/2' 
 '-x, -y, -z' 
 'x, -y, z-1/2' 
 '-x+1/2, -y+1/2, -z' 
 'x+1/2, -y+1/2, z-1/2' 
 
_cell_length_a                    5.3470(2) 
_cell_length_b                    13.0286(4) 
_cell_length_c                    11.7443(4) 
_cell_angle_alpha                 90.00 
_cell_angle_beta                  99.0360(10) 
_cell_angle_gamma                 90.00 
_cell_volume                      808.00(5) 
_cell_formula_units_Z             4 
_cell_measurement_temperature     123(2) 
_cell_measurement_reflns_used     3641
_cell_measurement_theta_min       3.127 
_cell_measurement_theta_max       27.494 
 
_exptl_crystal_description        Plate 
_exptl_crystal_colour             Colourless 
_exptl_crystal_size_max           0.24 
_exptl_crystal_size_mid           0.16 
_exptl_crystal_size_min           0.08 
_exptl_crystal_density_meas       'not measured' 
_exptl_crystal_density_diffrn     1.678 
_exptl_crystal_density_method     'not measured' 
_exptl_crystal_F_000              424 
_exptl_absorpt_coefficient_mu     0.153 
_exptl_absorpt_correction_type    multi-scan 
_exptl_absorpt_correction_T_min   0.928335
_exptl_absorpt_correction_T_max   1.0000 
_exptl_absorpt_process_details    
'SADABS v.2.03 (Bruker, 2001), R(int)=0.0233 before correction'  
 
_exptl_special_details 
; 
 ? 
; 
 
_diffrn_ambient_temperature       123(2) 
_diffrn_radiation_wavelength      0.71073 
_diffrn_radiation_type            MoK\a 
_diffrn_radiation_source          'fine-focus sealed tube' 
_diffrn_radiation_monochromator   graphite 
_diffrn_measurement_device_type   'smart 6K CCD area detector'  
_diffrn_measurement_method        'omega scans' 
_diffrn_detector_area_resol_mean  8 
_diffrn_standards_decay_%         0 
_diffrn_reflns_number             5412 
_diffrn_reflns_av_R_equivalents   0.0189 
_diffrn_reflns_av_sigmaI/netI     0.0112 
_diffrn_reflns_limit_h_min        -6 
_diffrn_reflns_limit_h_max        6 
_diffrn_reflns_limit_k_min        -16 
_diffrn_reflns_limit_k_max        16 
_diffrn_reflns_limit_l_min        -15 
_diffrn_reflns_limit_l_max        15 
_diffrn_reflns_theta_min          3.13 
_diffrn_reflns_theta_max          27.49 
_reflns_number_total              927 
_reflns_number_gt                 853 
_reflns_threshold_expression      I>2\s(I) 
 
_computing_data_collection        'Bruker SMART' 
_computing_cell_refinement        'Bruker SMART' 
_computing_data_reduction         'Bruker SHELXTL' 
_computing_structure_solution     'SHELXS-97 (Sheldrick, 1990)' 
_computing_structure_refinement   'SHELXL-97 (Sheldrick, 1997)' 
_computing_molecular_graphics     'Bruker SHELXTL' 
_computing_publication_material   'Bruker SHELXTL' 
 
_refine_special_details 
; 
 Refinement of F^2^ against ALL reflections.  The weighted R-factor wR and 
 goodness of fit S are based on F^2^, conventional R-factors R are based 
 on F, with F set to zero for negative F^2^. The threshold expression of 
 F^2^ > 2sigma(F^2^) is used only for calculating R-factors(gt) etc. and is 
 not relevant to the choice of reflections for refinement.  R-factors based 
 on F^2^ are statistically about twice as large as those based on F, and R- 
 factors based on ALL data will be even larger. 
; 
 
_refine_ls_structure_factor_coef  Fsqd  
_refine_ls_matrix_type            full 
_refine_ls_weighting_scheme       calc  
_refine_ls_weighting_details 
 'calc w=1/[\s^2^(Fo^2^)+(0.0536P)^2^+0.5294P] where P=(Fo^2^+2Fc^2^)/3' 
_atom_sites_solution_primary      direct 
_atom_sites_solution_secondary    difmap 
_atom_sites_solution_hydrogens    geom 
_refine_ls_hydrogen_treatment     refall 
_refine_ls_extinction_method      none 
_refine_ls_number_reflns          927 
_refine_ls_number_parameters      80 
_refine_ls_number_restraints      0 
_refine_ls_R_factor_all           0.0320 
_refine_ls_R_factor_gt            0.0295 
_refine_ls_wR_factor_ref          0.0871 
_refine_ls_wR_factor_gt           0.0838 
_refine_ls_goodness_of_fit_ref    1.049 
_refine_ls_restrained_S_all       1.049 
_refine_ls_shift/su_max           0.000 
_refine_ls_shift/su_mean          0.000 
 
loop_ 
 _atom_site_label 
 _atom_site_type_symbol 
 _atom_site_fract_x 
 _atom_site_fract_y 
 _atom_site_fract_z 
 _atom_site_U_iso_or_equiv 
 _atom_site_adp_type 
 _atom_site_occupancy 
 _atom_site_symmetry_multiplicity 
 _atom_site_calc_flag 
 _atom_site_refinement_flags 
 _atom_site_disorder_assembly 
 _atom_site_disorder_group 
O3 O 0.05791(15) 0.17309(6) 0.54141(7) 0.0203(2) Uani 1 1 d . . . 
O2 O 0.12913(15) 0.04318(6) 0.38714(7) 0.0223(2) Uani 1 1 d . . . 
O1 O 0.50078(16) 0.11961(6) 0.37699(7) 0.0230(2) Uani 1 1 d . . . 
N1 N 0.32566(16) -0.13294(6) 0.32572(7) 0.0157(2) Uani 1 1 d . . . 
C3 C 0.40760(19) -0.22024(8) 0.28563(8) 0.0164(2) Uani 1 1 d . . . 
C1 C 0.41799(18) -0.04486(7) 0.29096(8) 0.0147(2) Uani 1 1 d . . . 
C5 C 0.3524(2) 0.04944(7) 0.35468(8) 0.0159(2) Uani 1 1 d . . . 
H3 H 0.340(2) -0.2839(10) 0.3095(11) 0.013(3) Uiso 1 1 d . . . 
H3B H 0.055(3) 0.2378(15) 0.5471(15) 0.041(5) Uiso 1 1 d . . . 
H3A H -0.059(4) 0.1499(14) 0.5800(17) 0.039(4) Uiso 1 1 d . . . 
H2 H 0.112(4) 0.0979(17) 0.439(2) 0.063(6) Uiso 1 1 d . . . 
 
loop_ 
 _atom_site_aniso_label 
 _atom_site_aniso_U_11 
 _atom_site_aniso_U_22 
 _atom_site_aniso_U_33 
 _atom_site_aniso_U_23 
 _atom_site_aniso_U_13 
 _atom_site_aniso_U_12 
O3 0.0238(4) 0.0168(4) 0.0231(4) -0.0043(3) 0.0126(3) -0.0037(3) 
O2 0.0219(4) 0.0195(4) 0.0285(4) -0.0074(3) 0.0135(3) -0.0025(3) 
O1 0.0255(4) 0.0173(4) 0.0290(4) -0.0060(3) 0.0128(3) -0.0054(3) 
N1 0.0170(4) 0.0146(4) 0.0160(4) -0.0002(3) 0.0043(3) -0.0006(3) 
C3 0.0193(5) 0.0134(5) 0.0169(5) 0.0010(3) 0.0040(4) -0.0010(3) 
C1 0.0151(5) 0.0141(5) 0.0153(5) -0.0004(3) 0.0038(4) 0.0003(3) 
C5 0.0193(5) 0.0147(5) 0.0148(5) 0.0013(3) 0.0062(4) 0.0010(3) 
 
_geom_special_details 
; 
 All esds (except the esd in the dihedral angle between two l.s. planes) 
 are estimated using the full covariance matrix.  The cell esds are taken 
 into account individually in the estimation of esds in distances, angles 
 and torsion angles; correlations between esds in cell parameters are only 
 used when they are defined by crystal symmetry.  An approximate (isotropic) 
 treatment of cell esds is used for estimating esds involving l.s. planes. 
; 
 
loop_ 
 _geom_bond_atom_site_label_1 
 _geom_bond_atom_site_label_2 
 _geom_bond_distance 
 _geom_bond_site_symmetry_2 
 _geom_bond_publ_flag 
O3 H3B 0.85(2) . ? 
O3 H3A 0.88(2) . ? 
O2 C5 1.3116(13) . ? 
O2 H2 0.95(2) . ? 
O1 C5 1.2118(13) . ? 
N1 C3 1.3313(13) . ? 
N1 C1 1.3382(13) . ? 
C3 C3 1.392(2) 2_655 ? 
C3 H3 0.963(13) . ? 
C1 C1 1.4000(19) 2_655 ? 
C1 C5 1.5082(13) . ? 
 
loop_ 
 _geom_angle_atom_site_label_1 
 _geom_angle_atom_site_label_2 
 _geom_angle_atom_site_label_3 
 _geom_angle 
 _geom_angle_site_symmetry_1 
 _geom_angle_site_symmetry_3 
 _geom_angle_publ_flag 
H3B O3 H3A 106.2(16) . . ? 
C5 O2 H2 108.7(13) . . ? 
C3 N1 C1 117.85(9) . . ? 
N1 C3 C3 121.13(6) . 2_655 ? 
N1 C3 H3 118.3(7) . . ? 
C3 C3 H3 120.6(7) 2_655 . ? 
N1 C1 C1 120.70(5) . 2_655 ? 
N1 C1 C5 114.93(8) . . ? 
C1 C1 C5 124.10(6) 2_655 . ? 
O1 C5 O2 125.38(9) . . ? 
O1 C5 C1 121.77(9) . . ? 
O2 C5 C1 112.75(9) . . ? 
 
_diffrn_measured_fraction_theta_max    0.999 
_diffrn_reflns_theta_full              27.49 
_diffrn_measured_fraction_theta_full   0.999 
_refine_diff_density_max    0.266 
_refine_diff_density_min   -0.287 
_refine_diff_density_rms    0.073 
